# Supplementary material
Source: PubMed Central journal article supplement (PMC4991213)

**(a)** UAS-Toll<sup>10B/+</sup>; Act-G.S./+

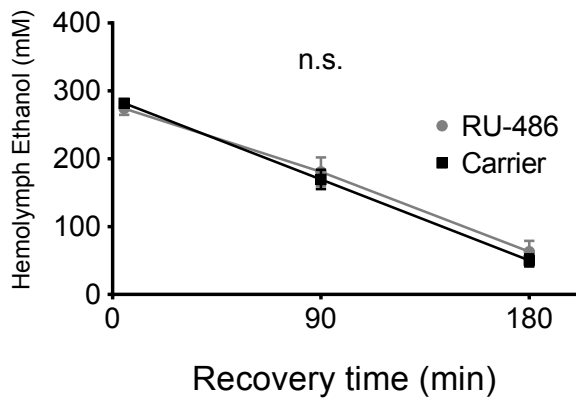

**(b)** Toll RNAi/Actin-G.S.

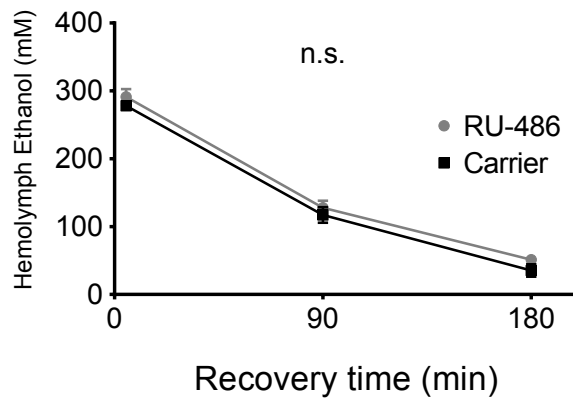

**(c)** Actin-G.S. x TRiP control

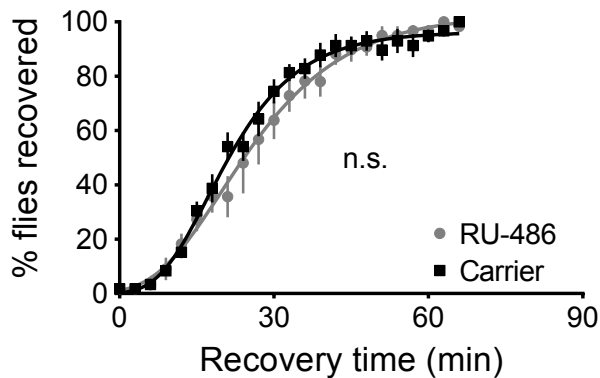

**(d)** +; +; Actin-G.S. / +

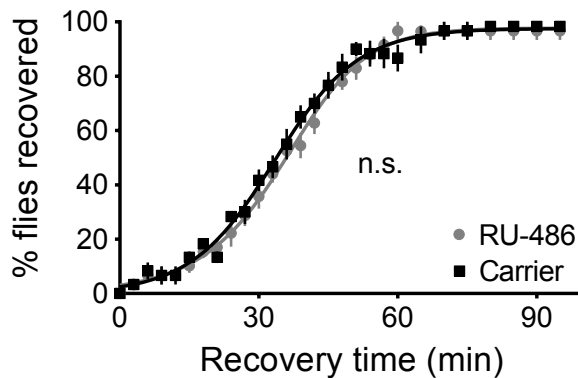

**(e)** Actin-G.S. x UAS-GFP

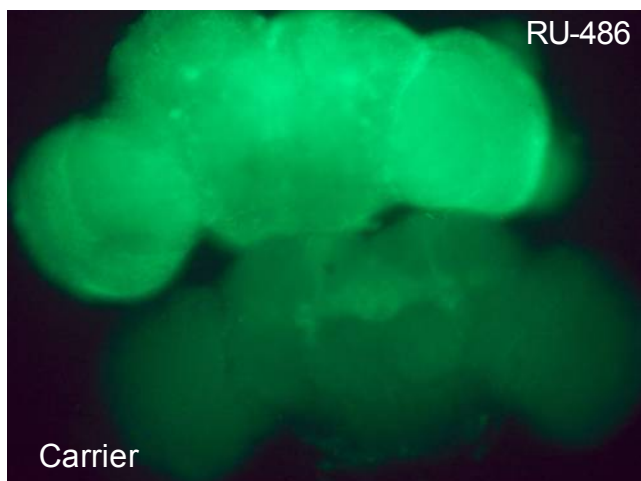

Supplement: NIHMS763513-supplement-Supp_Fig_S1.pdf [file NIHMS763513-supplement-Supp_Fig_S1.pdf]

**(a)**RU-486 fed UAS-Toll<sup>10B</sup>/+; Act-G.S./+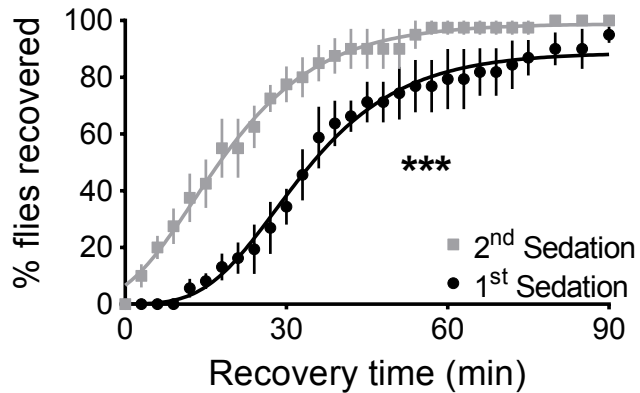**(b)**Dif<sup>1</sup> / Dif<sup>1</sup>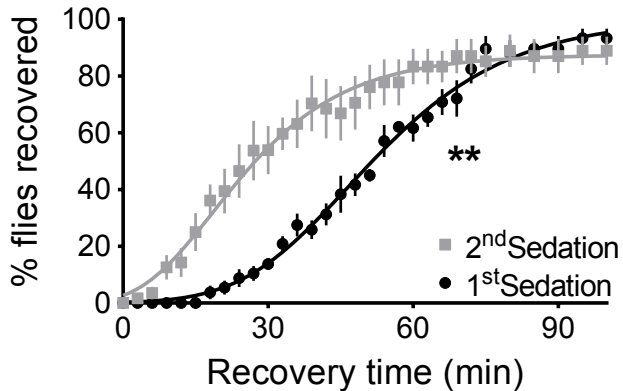

Supplement: NIHMS763513-supplement-Supp_Fig_S2.pdf [file NIHMS763513-supplement-Supp_Fig_S2.pdf]
